# Supplementary material for: Eco-Friendly and Effective Diatomaceous Earth/Peat (DEP) Microbial Carriers in the Anaerobic Biodegradation of Food Waste Products
Source: MDPI journal article supplement (doi:10.3390/en15093442), 2022-05-09
Supplement: s1 [file s1]

## Supplementary Materials

**Table S1.** Elemental content of diatomaceous earth (DE and peat (P).

| Material | N<br>(%) | C<br>(%) | H<br>(%) | S<br>(%) | O<br>(%) |
|----------|----------|----------|----------|----------|----------|
| DE       | -        | -        | -        | -        | 49.16    |
| P        | 2.55     | 53.25    | 6.01     | 0.13     | 23.18    |

DE: diatomaceous earth, P: peat

Figure S1a shows the nitrogen adsorption/desorption isotherms of the constituent materials of the DEP carrier material used in this paper, namely diatomite (DE) and pure peat. The volume of N<sub>2</sub> adsorbed by the DE material was much higher than for peat, at about 55 cm<sup>3</sup> g<sup>-1</sup> STP, while for peat it was only 2.7 cm<sup>3</sup> g<sup>-1</sup> STP. The rapid increase in gas volume shown in Figure S1a occurred above the relative pressure  $p/p_0$  value of 0.8. The curves presented in Figure S1b show pore size distribution also for DE material and peat.

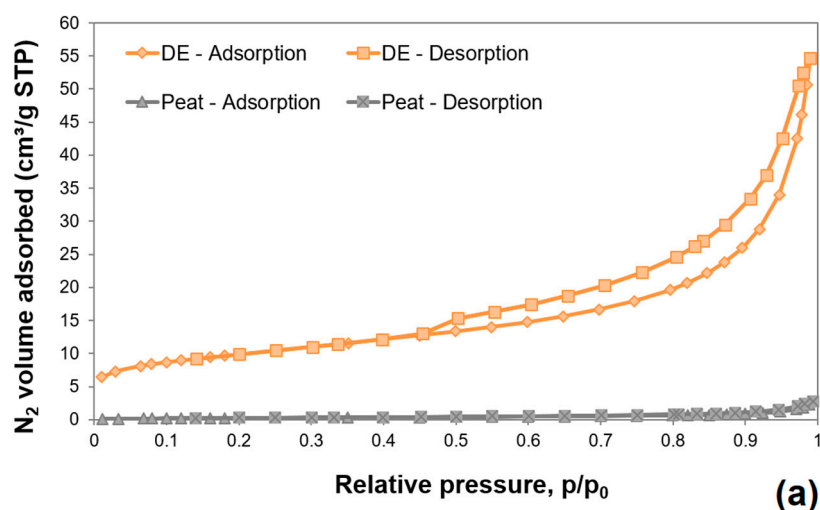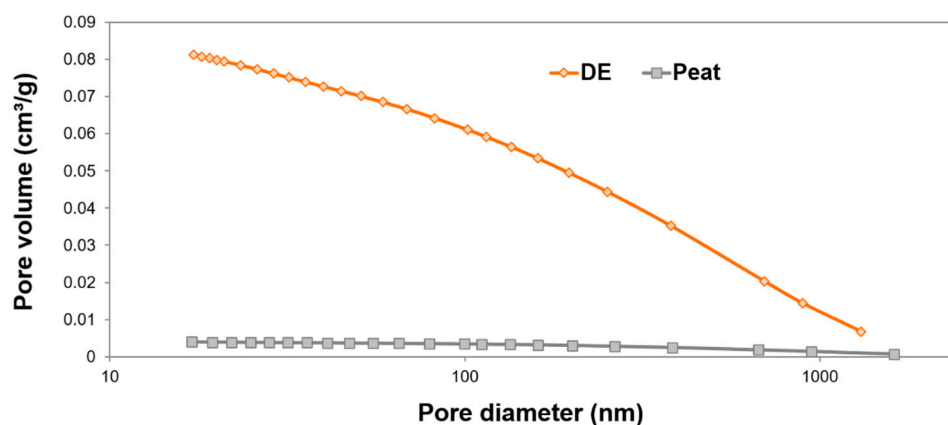

**Figure S1.** (a) N<sub>2</sub> adsorption/desorption isotherms and (b) pore size distribution of the diatomaceous earth (DE) and peat.

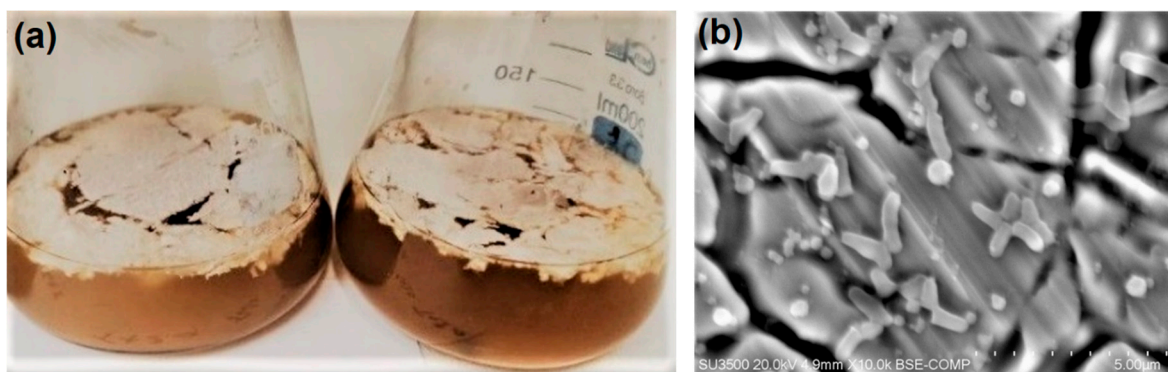

**Figure S2.** (a) A *Bacillus amyloliquefaciens* culture with the diatomaceous earth/peat system, (b) SEM image of cell *B. amyloliquefaciens* colonisation.

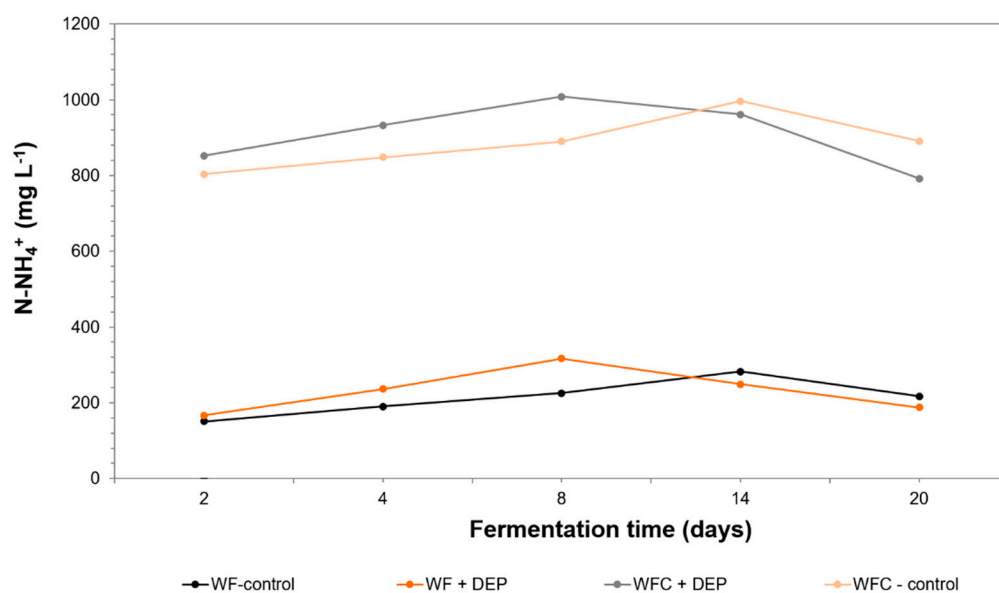

**Figure S3.** Changes in the  $\text{N-NH}_4^+$  during the anaerobic digestion of the WF-control, WF+DEP, WFC-control and WFC+DEP samples.
